# Supplementary material for: Reverse Trendelenburg Positioning in Open Rhinoplasty: A Systematic Review of Clinical outcomes
Source: Research Square preprint supplement (doi:10.21203/rs.3.rs-8663766/v1), 2026-01-28
Supplement: Supplementary file 1 [file 58077842e0a5939f9836f703.docx]

| Number of patients (N) | Intervention | Age (Mean) | Female: Male | Weight (KG) | BMI | ASA | Operative time | HR | MAP |
| --- | --- | --- | --- | --- | --- | --- | --- | --- | --- |
| 90 * | Group 5: 5 degrees RTP (N=30).  Group 10: 10 degrees RTP (N=30).  Group 20: 20 degrees RTP (N=30). | Group 5: 26.01 ± 10.3.  Group 10: 27.4 ± 7.4  Group 20: 26.06 ± 8.30 | Group 5: 20:10  Group 10: 21:9  Group 20: 22:8 | Group 5: 64.4 ±15.01  Group 10: 63.7 ±12.1  Group 20: 60.57 ±10.60 | Group 5: 23.1 ± 4.1  Group 10: 23.2 ± 3.4  Group 20: 21.30 ±3.86 | Group 5:  ASA I: 26  ASA II: 4  Group 10:  ASA I: 27  ASA II: 3  Group 20:  ASA I:26  ASA II:4 | Group 5: 62.1 ± 10.9  Group 10: 59.7 ±16.5  Group 20: 60.03 ±17.06  (minutes) | Group 5: 68.1 ± 10.2  Group 10: 66.3 ± 6.1    Group 20: 67.5 ± 7.9 | Group 5: 65.3 ± 6.4  Group 10: 64.1± 6.9  Group 20: 64.7 ± 6.4 |
| 30 | RTP (N=15): inclined at 30 degree angle, so  that the head is higher than the pelvis and the leg is  lower than hip  Head up group (N=15): inclined at  30 degree angle, so the head and shoulder are higher  than pelvis but legs are at same level of pelvis | All: 27.00±6.19  RTP: 26.73±8.40  Head up: 27.27±2.96  P- value: 0.161 | All: 18:12  RTP: 9:6  Head up:9:6 | All: 63.10±9.76  RTP: 63.36±10.06  Head up: 62.87±9.81  P-value: 0.895 | NR | All ASA I | RTP: 1.35 ± 0.43 h  Head-up: 1.28 ± 0.55 h  Not significant but no p value reported. | NR | SBP was between 80.90 mmHg during  operation; otherwise, the patient will be excluded  from study. |
| 58 | Group 1: (N=22) Supine  Group 2: (N=21) 15 degrees RTP  Group 3: (N=15) 20 degrees RTP | No statistically significant difference between, demographic, ASA, operative time, HR, SBP or DBP. No details provided | NR | NR | NR | No statistically significant difference between, demographic, ASA, operative time, HR, SBP or DBP. No details provided | No statistically significant difference between, demographic, ASA, operative time, HR, SBP or DBP. No details provided | No statistically significant difference between, demographic, ASA, operative time, HR, SBP or DBP. No details provided | No statistically significant difference between, demographic, ASA, operative time, HR, SBP or DBP. No details provided |

Table 2: Demographic data of patients.

*report no statistically significant difference in baseline demographic parameter’s, but no p-value reported.

RTP- reverse Trendelenburg.

ASA- American Society of Anaesthesiologists physical status classification.

HR- Heart rate (beats/min).

SBP- Systolic blood pressure.

MAP- mean arterial pressure.

NR- not reported
