# Supplementary material for: Reverse Trendelenburg Positioning in Open Rhinoplasty: A Systematic Review of Clinical outcomes
Source: Research Square preprint supplement (doi:10.21203/rs.3.rs-8663766/v1), 2026-01-28
Supplement: Supplementary file 2 [file 9088a5b5d9b40bf8ef38b3e4.docx]

| Author | Year of publication | Country | Journal | Type of study |
| --- | --- | --- | --- | --- |
| Elif Kubra Koc | 2022 | Turkey | American Journal of Otolaryngology–Head and Neck Medicine and Surgery | RCT |
| Navid Nooraei | 2013 | Iran | International Journal of Preventive Medicine | RCT |
| Mehmet ozkose | 2016 | Turkey | Aesthetic plastic surgery (ISAPS) | RCT |

RCT- Randomised controlled Trial.

Table 1: Baseline characteristics of included studies
