# Supplementary material for: Reverse Trendelenburg Positioning in Open Rhinoplasty: A Systematic Review of Clinical outcomes
Source: Research Square preprint supplement (doi:10.21203/rs.3.rs-8663766/v1), 2026-01-28
Supplement: Supplementary file 3 [file b2413e5f75970aef2d376361.docx]

Table 3: Summarises the Interventions described by the authors.

| Elif Kubra Koc | Navid Nooraei | Mehmet ozkose |
| --- | --- | --- |
| General Anaesthesia protocol was standardized for all groups during the study, with the aim to maintain the MAP between 50 and 60 mmHg. | General Anaesthesia protocol was standardized for all groups during the study. The systolic blood pressure was kept between 80.90 mmHg during the operation; otherwise, the patient were excluded from the study. | General Anaesthesia protocol was standardized for all groups during the study, with the aim to maintain the MAP between 65-70mmHg. |
| Epinephrine 0.01% and 5% lidocaine mixture was injected into the septum and nose (no volume was mentioned). | No mention of local anaesthetic use. | 1:200000 epinephrine with 2% lidocaine was used as a local anaesthetic (no volume was mentioned). |
| Patients underwent the following procedure: open primary rhinoplasty, Septoplasties, dorsum reduction, alar correction, and lateral osteotomies. Hump reduction and lateral osteotomy were applied to all patients. | Patients underwent the following procedure: open primary rhinoplasty. No further details mentioned regarding th surgical technique. | Patients underwent the following procedure: open primary rhinoplasty, tip plasty, hump resection, lateral and medial osteotomy, septoplasty. Secondary surgeries, and those requiring cartilage grafts, were not included. |
| Postoperatively all patients had silicone nasal stents and external nasal splints. | Postoperatively nasal packing and dorsal nasal splints were used in all. | No mention of post operative splinting or packing. |

* All authors excluded patients with medical co-morbidities, clotting derangements and patients on blood thinners. No mention of Tranexamic acid use by any of the papers.

** Osteotomy details: piezosurgery Vs conventional technique not mentioned.
