# Supplementary material for: Reverse Trendelenburg Positioning in Open Rhinoplasty: A Systematic Review of Clinical outcomes
Source: Research Square preprint supplement (doi:10.21203/rs.3.rs-8663766/v1), 2026-01-28
Supplement: Supplementary file 4 [file bf2a21f6a6c23154b9dbc8b9.docx]

|  | Elif Kubra Koc | Navid Nooraei | Mehmet ozkose |
| --- | --- | --- | --- |
|  | - Operation time (mins). - Intraoperative bleeding. - Periorbital Odema. - Periorbital Ecchymosis. - Surgical field evaluation score. | - Operation time (hours) - Intraoperative bleeding. | - Operation time (mins). - Intraoperative bleeding. - Surgeon satisfaction. |
| Results | Age, weight (kg), BMI, ASA, gender, operation times and perioperative hemodynamic changes (HR and MAP) showed no statistically significant difference among the three groups. | Age, weight, operation time and perioperative hemodynamic changes (HR and MAP) showed no statistically significant difference among the two groups. | Patient demographics, ASA, perioperative hemodynamic changes (HR, SBP and DBP) or operative times showed no statistically significant difference among the three groups. |
|  | **Operation time (mins)**  (P-value not significant)   - Group 5: 62.1 ± 10.9 - Group 10: 59.7 ± 16.5 - Group 20: 60.03 ± 17.06   **Intra operative bleeding (mls)** :  Group 5: 109.1 ± 34.6  Group 10: 73.3 ± 41.4  Group 20: 70.2 ± 17.3  Group 5 Vs Group 10: P-value 0.004  Group 5 Vs Group 20: P-value 0.001 | **Operation time (hours)**  (P-value not significant)  RTP group (1.35 ± 0.43 h)  heads‑up group (1.28 ± 0.55 h).  **Intra operative bleeding (mls)**  RTP: 77.00±13.20  Head up: 83.33±21.18  P-Value: 0.233 | **Operation time (mins):**  (Time not mentioned, but P-value not significant)  .  **Intra operative bleeding (mls):**  **Group 1 was higher than 2 (P-value 0.001)**  Group 1: 96.6818  St deviation: 123.10019  Min: 10  Max: 560  Group 2: 25.5714  St deviation: 42.33270  Min:5  Max: 200  **Group 1 was higher than 3 (P-value 0.002)**  Group 1: 96.6818  St deviation: 123.10019  Min: 10  Max: 560  Group 3: 28.3333  St deviation: 34.31090  Min: 5  Max: 120 |
|  | **Periorbital odema**  **Odema Lower in group 20 than group 5 on day 1,3 and 7.**  Day 1:  Group 20: 3 (0–4)  Group 5: 2 (1–4)  p value= 0.001  Day 3:  Group 20: 3 (0–4)  Group 5: 3 (0–4)  p value= 0.006  Day 7:  Group 20: 0 (0–1)  Group 5: 1 (0–3)  p value= 0.001  **Odema Lower in Group 20 than 10 only on day 7.**  Day 7  Group 20: 0 (0-1)  Group 10: 0 (0–2)  p value= 0.004 |  | **Surgeon satisfaction:**  (No confidence intervals mentioned).    **Group 1 was lower than 2**  P-value = 0.045  **Group 1 was lower than 3**  P-value = 0.048 |
|  | **Periorbital ecchymosis**  **Ecchymosis is Lower in group 20 than group 5 on day 1 and 3.**  Day 1:  Group 20: 4 (0–4)  Group 5: 2 (0–4)  p value = 0.001  Day 3:  Group 20: 4 (0–4)  Group 5: 3 (1–4)  p value = 0.003  **Ecchymosis Lower in Group 20 than 10 only on day 1.**  Day 1  Group 20: 4 (0–4)  Group 10: 2 (0–4)  p value= 0.001 |  |  |
|  | **Surgical field evaluation score**  (No confidence intervals mentioned).  Lower in group 10 and 20 compared to group 5.  Group 10 Vs 5: p = 0.013  Group 20 Vs 5: p = 0.014 |  |  |

Table 4: Summarises the main outcome measures and results.

RTP- reverse Trendelenburg.

ASA- American Society of Anaesthesiologists physical status classification.

HR- Heart rate (beats/min).

SBP- Systolic blood pressure.

DBP-Diastolic blood pressure.

MAP- mean arterial pressure.

BMI-body mass index (kg/m2)

Elif Kubra Koc assessed surgical field bleeding by using a Surgical field evaluation score, according to the category scale adapted by Fromme et al..

[11] Fromme GA, MacKenzie RA, Gould ABJr, Lund BA, Offord KP. Controlled hypotension for orthognatic surgery. Anesth Analg 1986;65:683–6.

Elif Kubra Koc  assessed periorbital odea and ecchymosis by the following method: each patient was digitally photographed by a non-study observer on the postoperative 1st, 3rd, and 7th day. Periorbital ecchymosis and eyelid edema were assessed individually in each patient, using digital photographs of a non-study observer, on a scale ranging from 0 to 4. [18]

[18] Gurlek A, Fariz A, Aydogan H, Ersoz-Ozturk A, Eren AT. Effects of different corticosteroids on edema and ecchymosis in open rhinoplasty. Aesthetic Plast Surg 2006;30:150–4. https://doi.org/10.1007/s00266-005-0158-1.

Navid Nooraei measured intraoperative bleeding by measuring the blood that accumulated in the suction bottle aspirator and each used gauze was considered as 20 mL blood loss.

Mehmet ozkose measured intra operative bleeding by measuring the collected via aspirator, while he assessed Surgeon satisfaction on a scale of 1-5 (1-excellent, 2-good, 3-acceptable, 4-bad and 5-very bad).
